# Supplementary material
Source: Springer Nature journal article supplement (https://www.springermedizin.de/resource/supplementary/12950_2010_147_MOESM4_ESM.pdf/9558060)

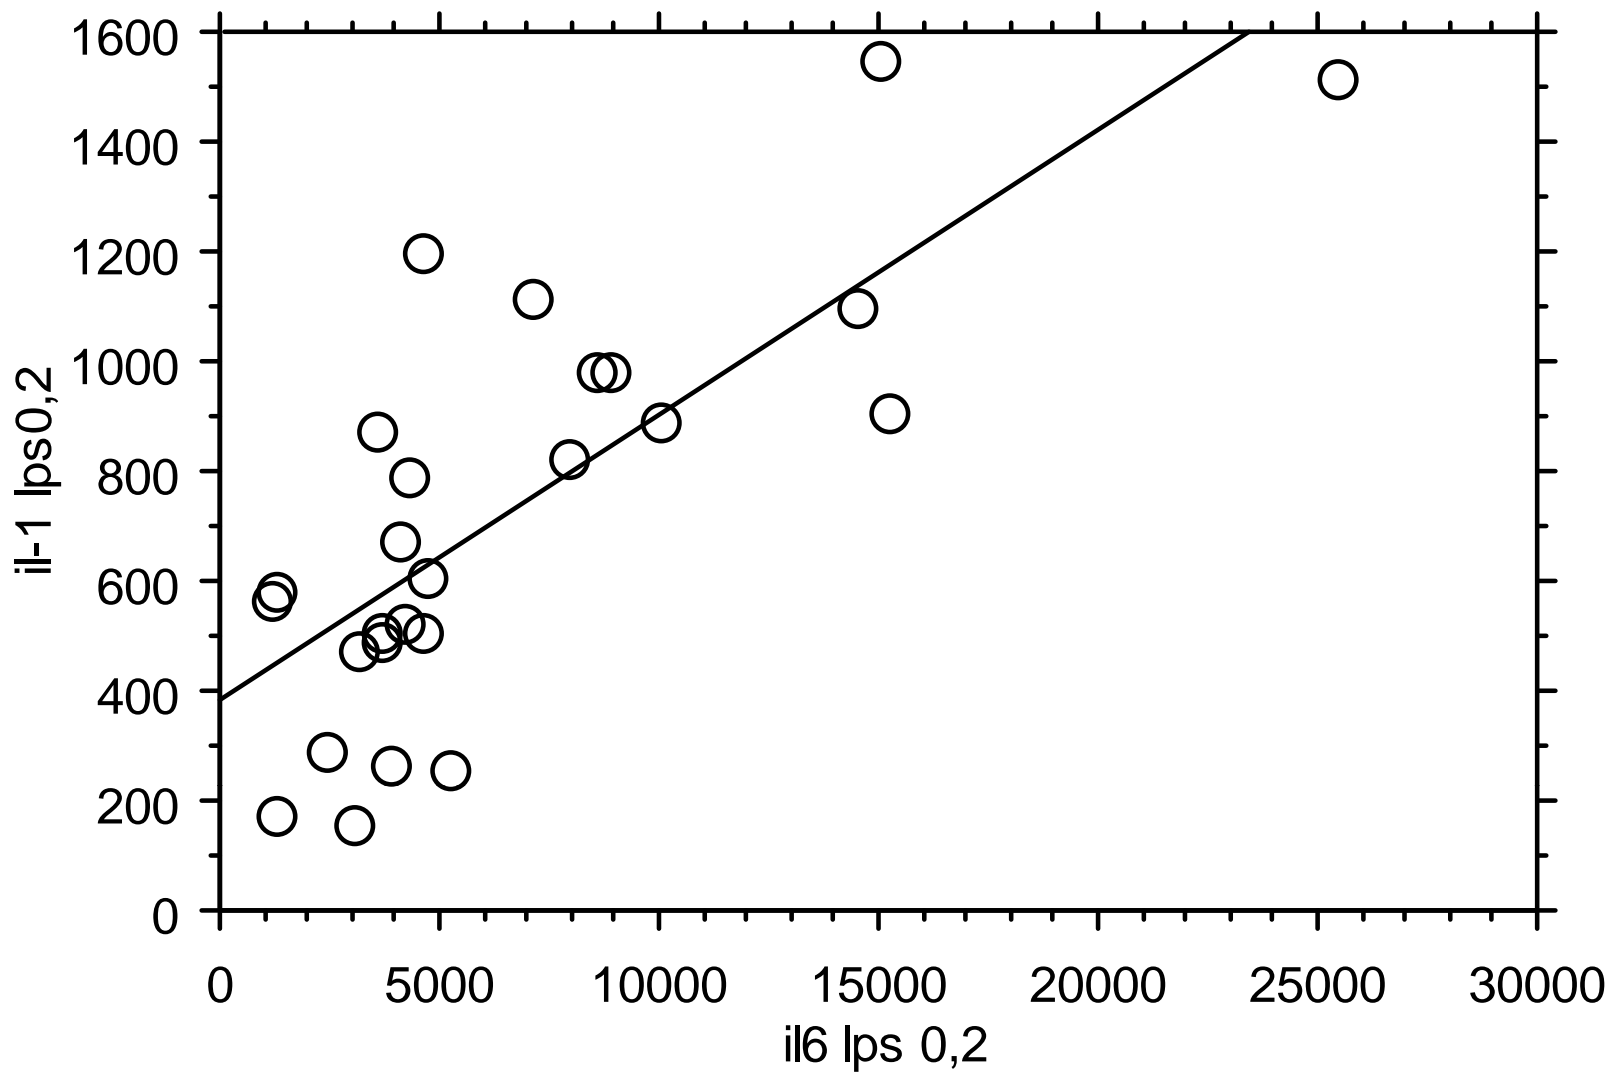

$Y = 383,193 + ,052 * X; R^2 = ,583$

Supplement: MOESM4 [file 9558060]
